# Supplementary material
Source: MDPI journal article supplement (https://www.mdpi.com/2071-1050/13/4/1920)
Supplement: s1 [file s1]

## INTERVIEW PLAN

**Interviewees/Participants:** *Local stakeholders in Longwu Town, Zhejiang Province*

**Research project:** “Integrating a local asset/resource into tourism and leisure offering: The case of Longwu Town, Zhejiang Province, China”

**Purpose:** The main aim of this project is to suggest and test a framework of adequate strategies, prerequisites to and critical success factors for the effective pairing between tea offering and tourism/leisure activities; and accordingly formulate recommendations and guidance to involved stakeholders and authorities for sustainable action plans.

### SECTION 1. Theoretical foundations and rationale

The respondent is asked to consider the following items and express his/her opinion, rate the importance or level of agreement on these (*Please select your answer with an ‘X’*).

#### 1.1 Adequate approaches for sustainable development of tea tourism

Based on the foundations of sustainable development, tea assets and resources can be efficiently and effectively integrated into tourism and leisure activities in a sustainable manner through the following approaches. (*Please select your answer with an ‘X’ for each item*).

|                                | Not at all important | Slightly important | Important | Fairly important | Very important |
|--------------------------------|----------------------|--------------------|-----------|------------------|----------------|
| Sustainable tourism management |                      |                    |           |                  |                |
| Community-based tourism        |                      |                    |           |                  |                |
| Strategic marketing planning   |                      |                    |           |                  |                |
| Other (please specify) .....   |                      |                    |           |                  |                |

#### 1.2 Aims and means

|                                                                | Not at all important | Slightly important | Important | Fairly important | Very important |
|----------------------------------------------------------------|----------------------|--------------------|-----------|------------------|----------------|
| <b>AIMS</b>                                                    |                      |                    |           |                  |                |
| Protecting local natural resources                             |                      |                    |           |                  |                |
| Developing human resources                                     |                      |                    |           |                  |                |
| Respecting the limits/carrying capacity                        |                      |                    |           |                  |                |
| Creating sustainable links between nature, economy and society |                      |                    |           |                  |                |

|                                                                        |  |  |  |  |  |
|------------------------------------------------------------------------|--|--|--|--|--|
| Creating business and job opportunities for local residents            |  |  |  |  |  |
| <b>MEANS/WAYS</b>                                                      |  |  |  |  |  |
| Long-term planning, timely adjustment                                  |  |  |  |  |  |
| Development based on local stakeholders                                |  |  |  |  |  |
| Planning, management and ownership by local stakeholders               |  |  |  |  |  |
| Engagement/involvement by local communities                            |  |  |  |  |  |
| Small-scale projects and infrastructure                                |  |  |  |  |  |
| Local partnerships and alliances                                       |  |  |  |  |  |
| Integrated marketing communications                                    |  |  |  |  |  |
| Designing and offering unique sales value propositions themed products |  |  |  |  |  |
| Segmenting, Positioning and Targeting through the Theming              |  |  |  |  |  |
| Other (please specify) ...                                             |  |  |  |  |  |
|                                                                        |  |  |  |  |  |
|                                                                        |  |  |  |  |  |

## SECTION 2. Rational of implementable/workable framework for managing the strategic partnership between tea resources and tourism/leisure industry

The interviewee is asked to consider the following items and express his/her opinion, rate the level of importance or level of agreement on these (*Please select your answer with an 'X'*).

### 2.1 Appropriate strategies and actions

The appropriate management of the strategic partnership/pairing between tea resources and tourism/leisure industry and offering involves a series of specific strategies and actions.

|                                                                                                                                | Not at all important | Slightly important | Important | Fairly important | Very important |
|--------------------------------------------------------------------------------------------------------------------------------|----------------------|--------------------|-----------|------------------|----------------|
| <b>1 CORE/MAISTRATEGIES</b>                                                                                                    |                      |                    |           |                  |                |
| <b>1.1 Strategic partnership</b>                                                                                               |                      |                    |           |                  |                |
| Collaborative forms: <ul style="list-style-type: none"> <li>• Networks</li> <li>• Clusters</li> <li>• Product clubs</li> </ul> |                      |                    |           |                  |                |
| <b>1.2 Theming strategy</b>                                                                                                    |                      |                    |           |                  |                |
| 1.2.1 Experience opportunities to know,                                                                                        |                      |                    |           |                  |                |

|                                                                   |  |  |  |  |  |
|-------------------------------------------------------------------|--|--|--|--|--|
| taste and value all aspects of tea assets and resources           |  |  |  |  |  |
| 1.2.2 Design and creation of theme products                       |  |  |  |  |  |
| <b>2 SUPPORT STRATEGIES</b>                                       |  |  |  |  |  |
| 2.1 Development of human resources (skills and know-how)          |  |  |  |  |  |
| 2.2 Product development (Creativity and innovation)               |  |  |  |  |  |
| 2.3 Quality management (Customer care and continuous improvement) |  |  |  |  |  |
| 2.4 Integrated marketing communications                           |  |  |  |  |  |
| 2.5 Other (please specify) ...                                    |  |  |  |  |  |
|                                                                   |  |  |  |  |  |

## 2.2 General opinion/perception about the suggested implementable framework

What is your general opinion about the value and utility of the suggested implementable framework for the appropriate strategic partnership between tea resources and tourism/leisure industry and offering?

(Please select your answer with an 'x')

|                 | Not all Useful | Slightly useful | Useful | Fairly useful | Very Useful |
|-----------------|----------------|-----------------|--------|---------------|-------------|
| General opinion |                |                 |        |               |             |

|                | Strongly disagree | Disagree | Neutral / Neither agree or disagree | Agree | Strongly agree |
|----------------|-------------------|----------|-------------------------------------|-------|----------------|
| It is valuable |                   |          |                                     |       |                |
| It is useful   |                   |          |                                     |       |                |

## SECTION 3. The main prerequisites and critical success factors

The participant is asked to express his/her opinion, rate the level of importance or level of agreement about the main prerequisites and key success factors in the field of strategic partnership/pairing between tea and tourism/leisure (Please select your answer with an 'x')

**3.1 The main prerequisites/necessary conditions** for the successful and effective management of the strategic partnership

|                                                  | Not at all important | Slightly important | Important | Fairly important | Very important |
|--------------------------------------------------|----------------------|--------------------|-----------|------------------|----------------|
| Elaborate on and build up alliances              |                      |                    |           |                  |                |
| Creation of platform of common interests         |                      |                    |           |                  |                |
| Involvement and engagement of local stakeholders |                      |                    |           |                  |                |
| Teamwork and team-building                       |                      |                    |           |                  |                |
| Long term commitment                             |                      |                    |           |                  |                |
| Full support                                     |                      |                    |           |                  |                |
| Leadership                                       |                      |                    |           |                  |                |
| Achievement of mutually shared benefits          |                      |                    |           |                  |                |
| Resource sharing                                 |                      |                    |           |                  |                |
| Fair and equitable distribution of results       |                      |                    |           |                  |                |
| Others (please specify) ...                      |                      |                    |           |                  |                |
|                                                  |                      |                    |           |                  |                |
|                                                  |                      |                    |           |                  |                |

### 3.2 Critical success factors for successful management of strategic partnership

|                                                                    | Not at all important | Slightly important | Important | Fairly important | Very important |
|--------------------------------------------------------------------|----------------------|--------------------|-----------|------------------|----------------|
| Creation of robust tea resource base /tea tourism project          |                      |                    |           |                  |                |
| Development of complementary competencies, capabilities and skills |                      |                    |           |                  |                |
| Knowledge and intelligence sharing and dissemination               |                      |                    |           |                  |                |
| Market-orientation and customer-minded                             |                      |                    |           |                  |                |
| Coordination and cooperation                                       |                      |                    |           |                  |                |
| Control, monitoring and assessment                                 |                      |                    |           |                  |                |
| Continuous improvement in all domains                              |                      |                    |           |                  |                |
| Investments: Devote sufficient resources (human and financial)     |                      |                    |           |                  |                |
| Environmental preservation: rational exploitation of resources     |                      |                    |           |                  |                |

|                                                              |  |  |  |  |  |
|--------------------------------------------------------------|--|--|--|--|--|
| Appropriate institutional framework and managerial structure |  |  |  |  |  |
| Efficient and financially viable operation                   |  |  |  |  |  |
| Elaboration and implementation of effective action plans     |  |  |  |  |  |
| Others (Please specify) ...                                  |  |  |  |  |  |
| ...                                                          |  |  |  |  |  |

**3.3 Comments:** Do you wish to add any further comments? Please feel free to do so.

---



---



---



---



---



---



---

#### SECTION 4. Profile: Personal information

##### 4.1 Gender:

|        |  |
|--------|--|
| Male   |  |
| Female |  |

##### 4.2 Age group (years):

|          |  |
|----------|--|
| 18 to 25 |  |
| 26 to 30 |  |
| 31 to 35 |  |
| 36 to 45 |  |
| 46 to 55 |  |
| 56 to 65 |  |
| 65+      |  |

##### 4.3 Educational level

|                     |  |
|---------------------|--|
| High school         |  |
| University degree   |  |
| Postgraduate degree |  |
| Other               |  |
|                     |  |

##### 4.4 Occupation: What is your work/professional capacity?

|                       |  |
|-----------------------|--|
| Student               |  |
| Admin/Office employee |  |
| Services              |  |
| Technician/Artisan    |  |
| Civil servant         |  |
| Professional          |  |
| Businessman           |  |
| Unemployed            |  |
| Other (specify)....   |  |

**4.5 Industry:** in which industry or activity are you active/involved ?

|                           |  |
|---------------------------|--|
| Accommodation             |  |
| Catering                  |  |
| Tea processing            |  |
| Trade/retail              |  |
| Cultural activity         |  |
| Leisure and entertainment |  |
| Other (specify)....       |  |

Position/Capacity: .....

Years of experience: .....

We would like to thank you for your time and cooperation!

The Research Team  
Department of Tourism Management  
NINGBO UNIVERSITY
